# Supplementary material
Source: PubMed Central journal article supplement (PMC1325000)

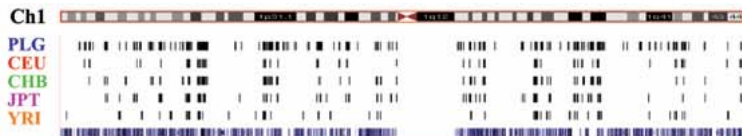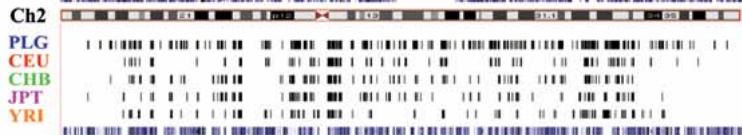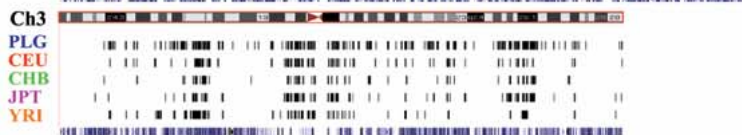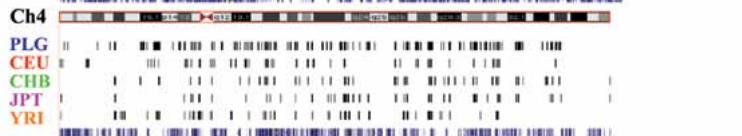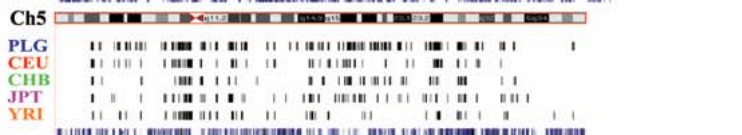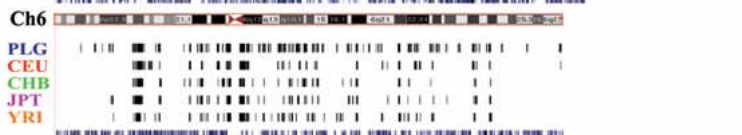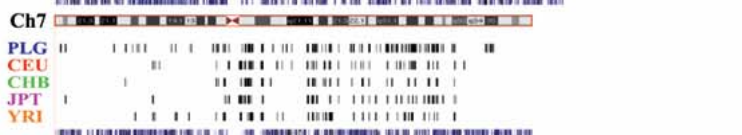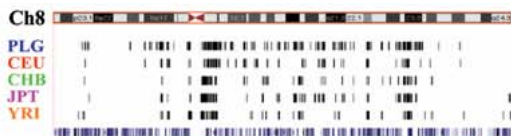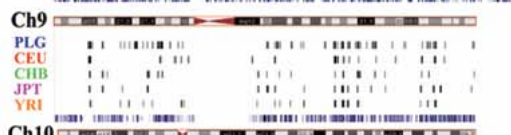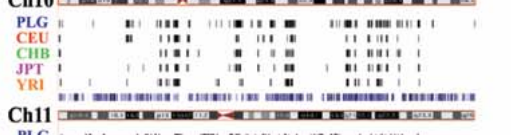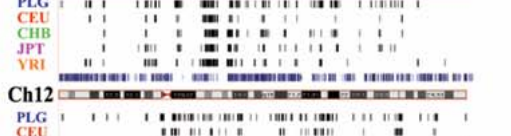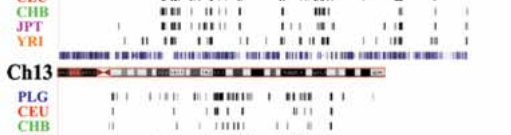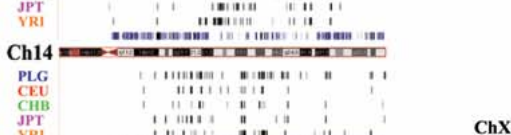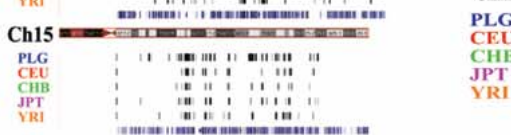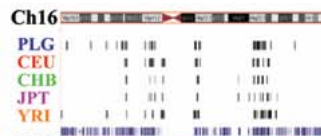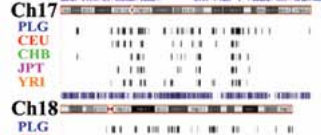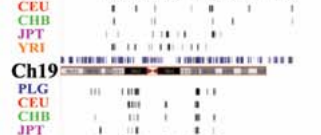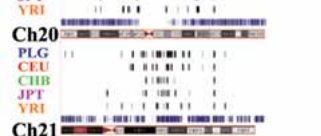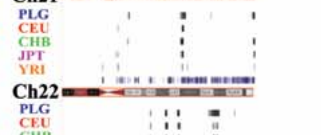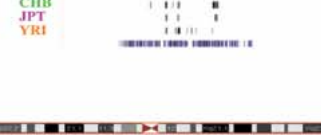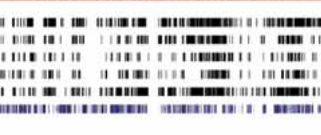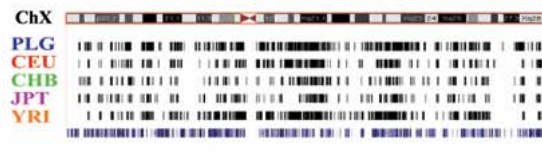

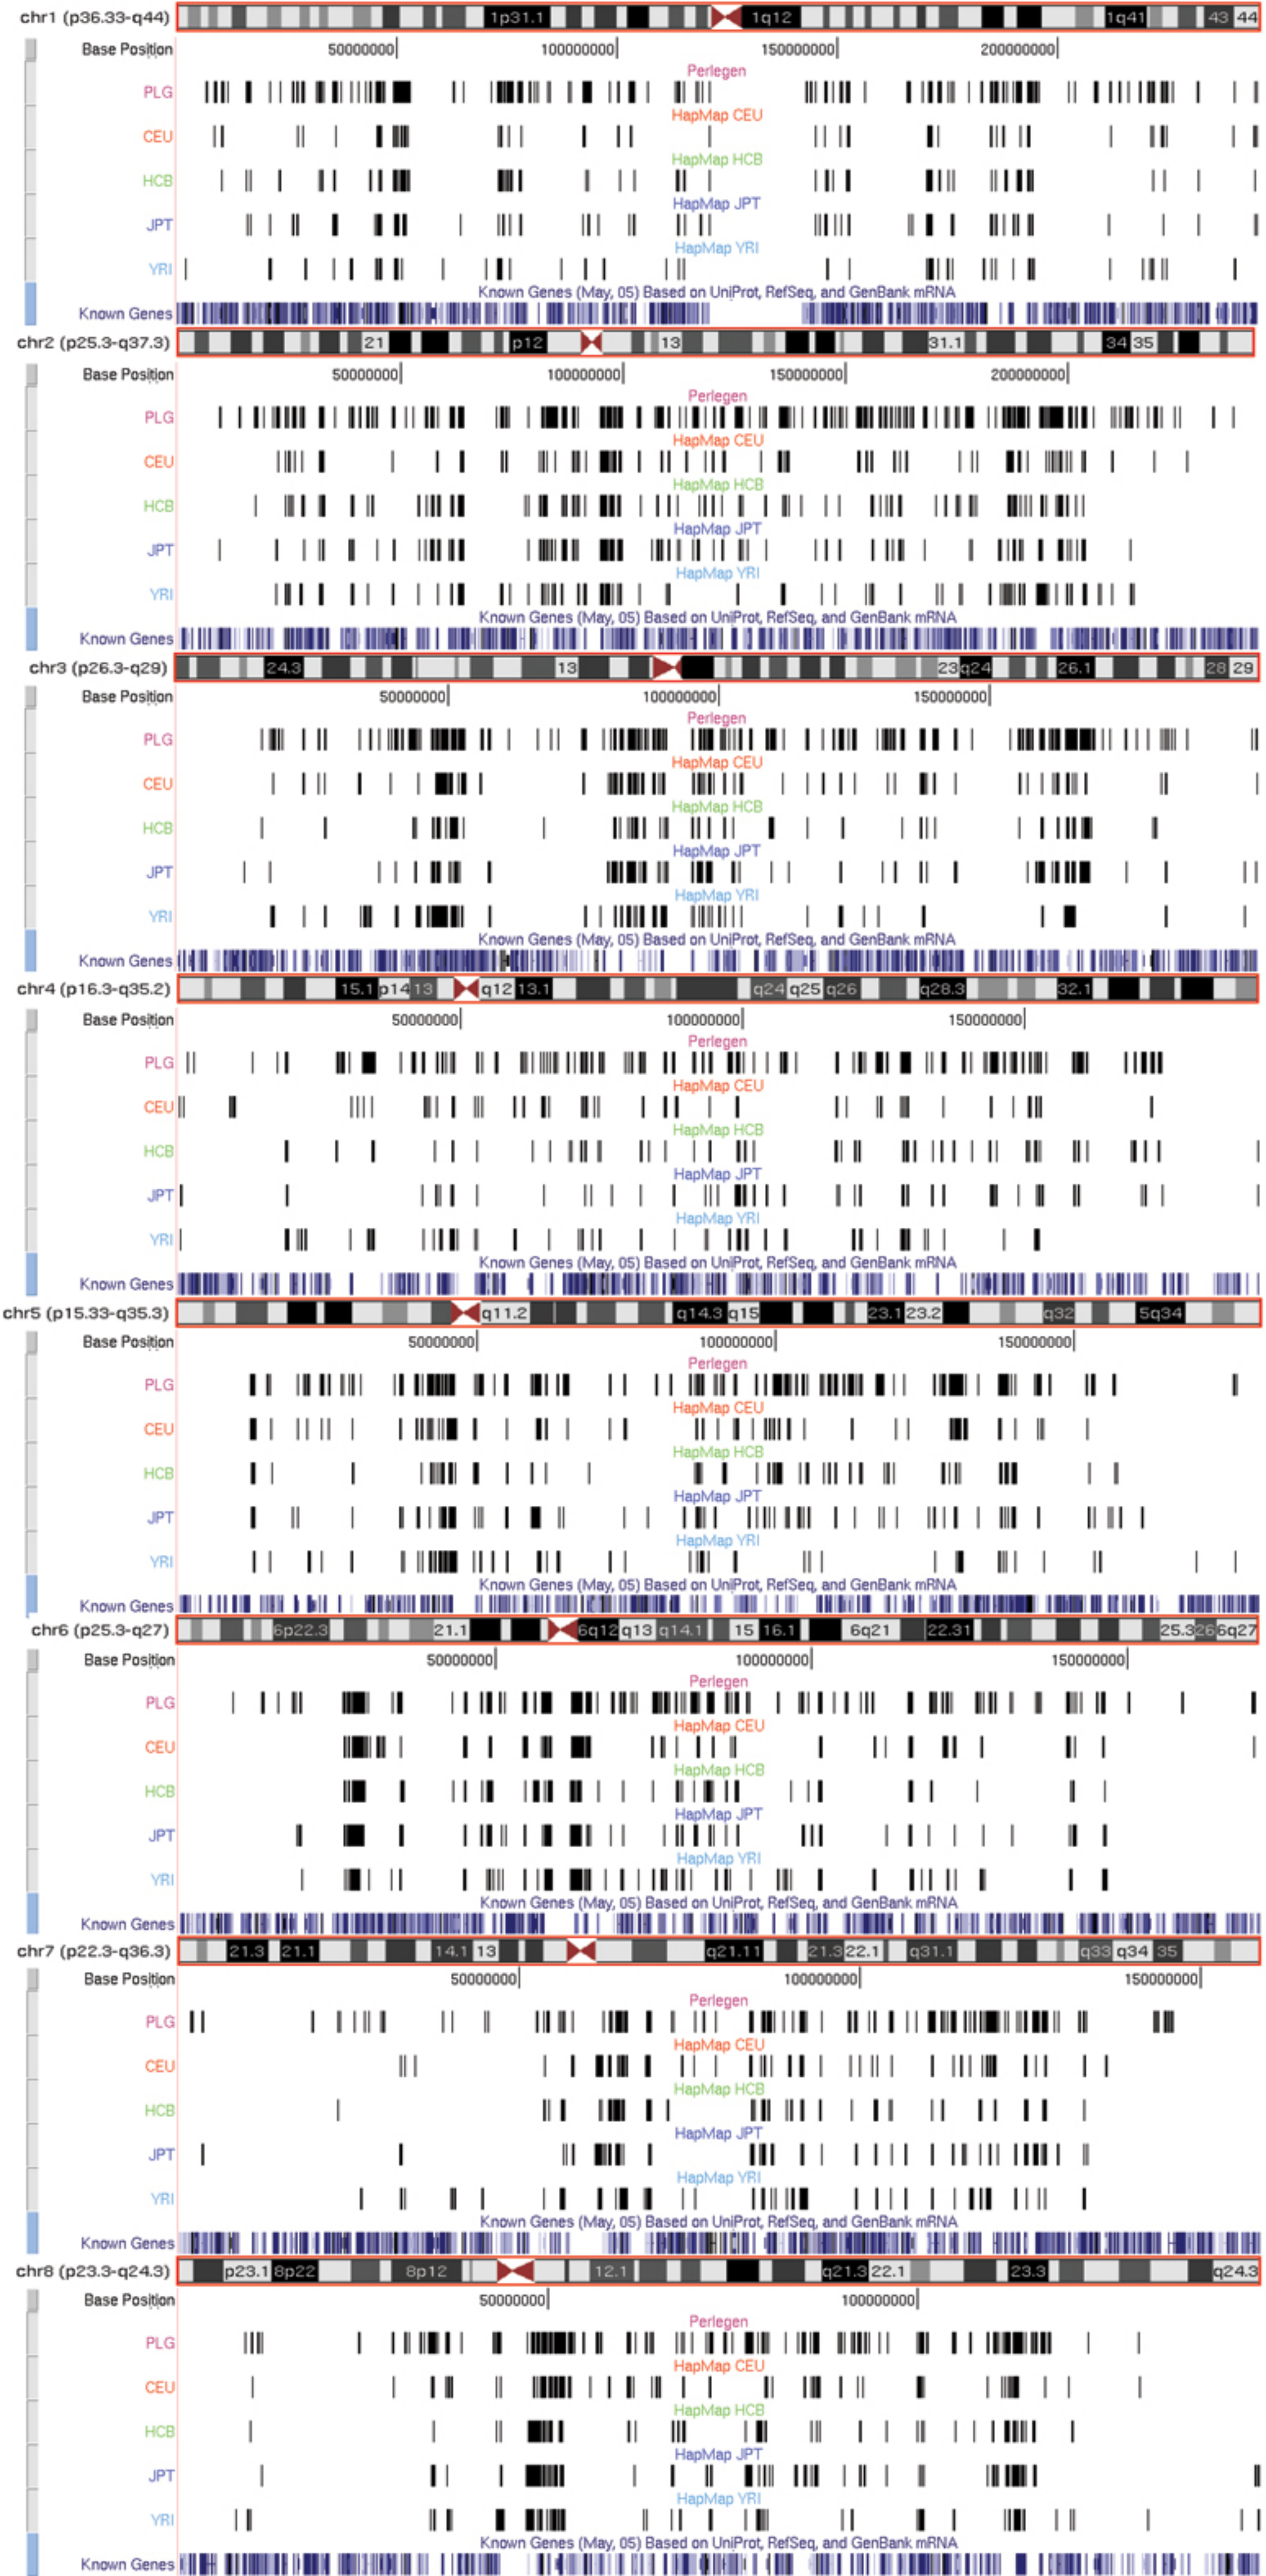

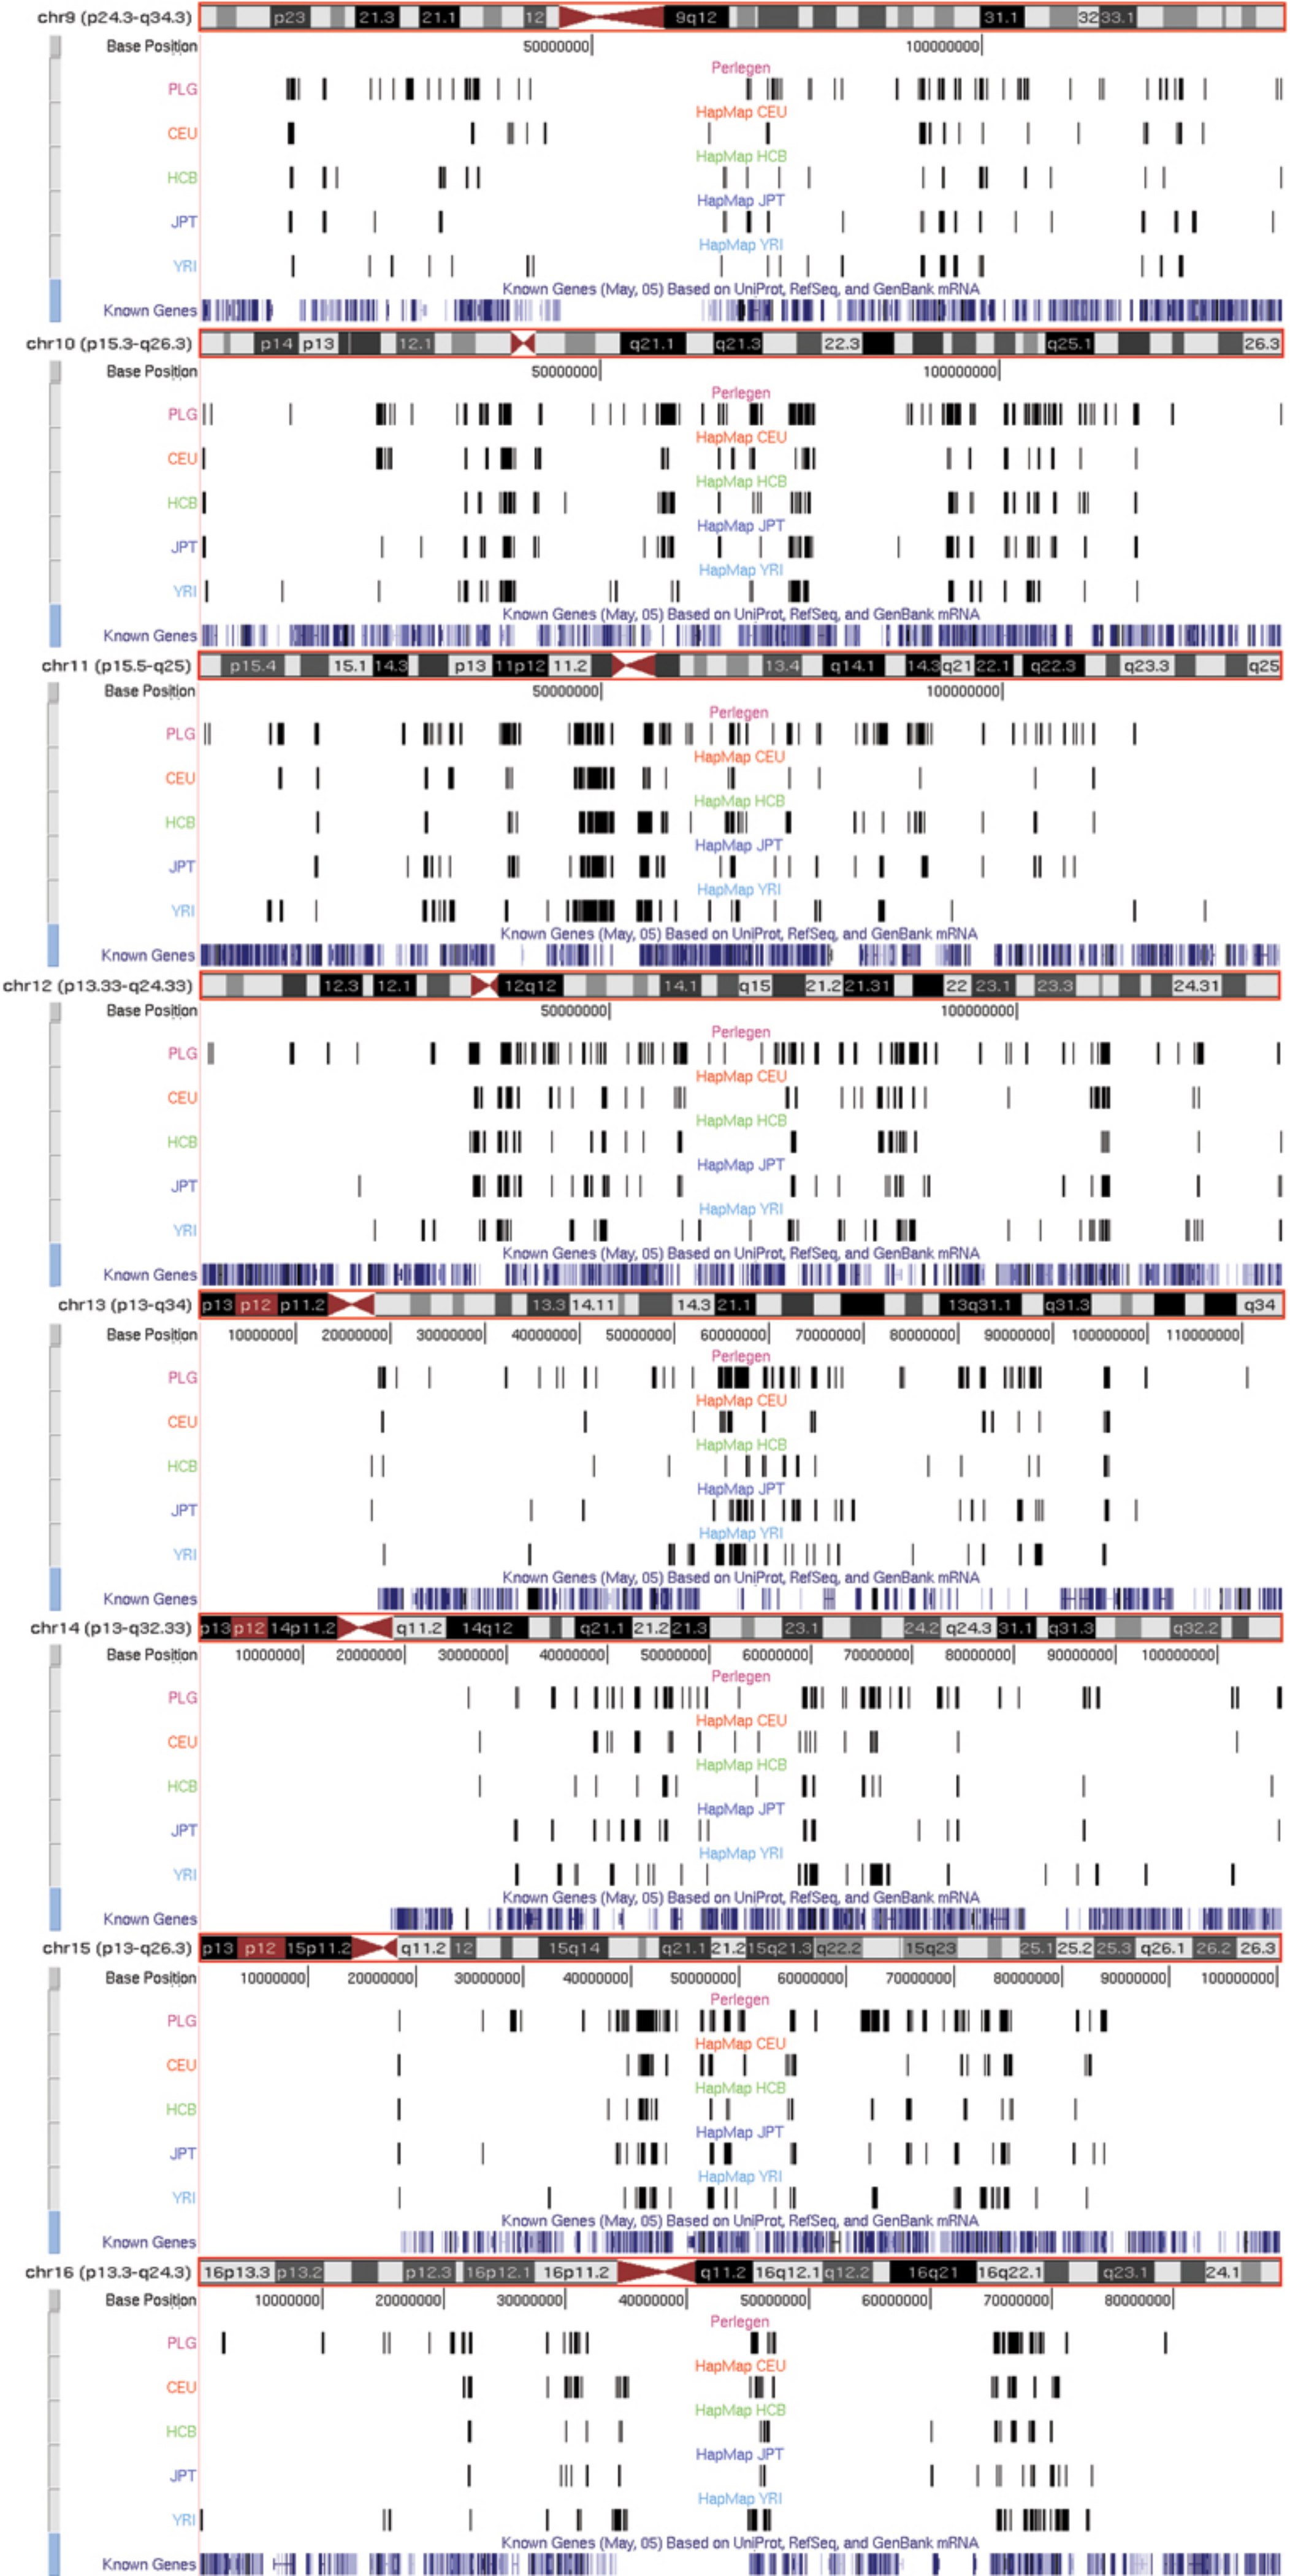

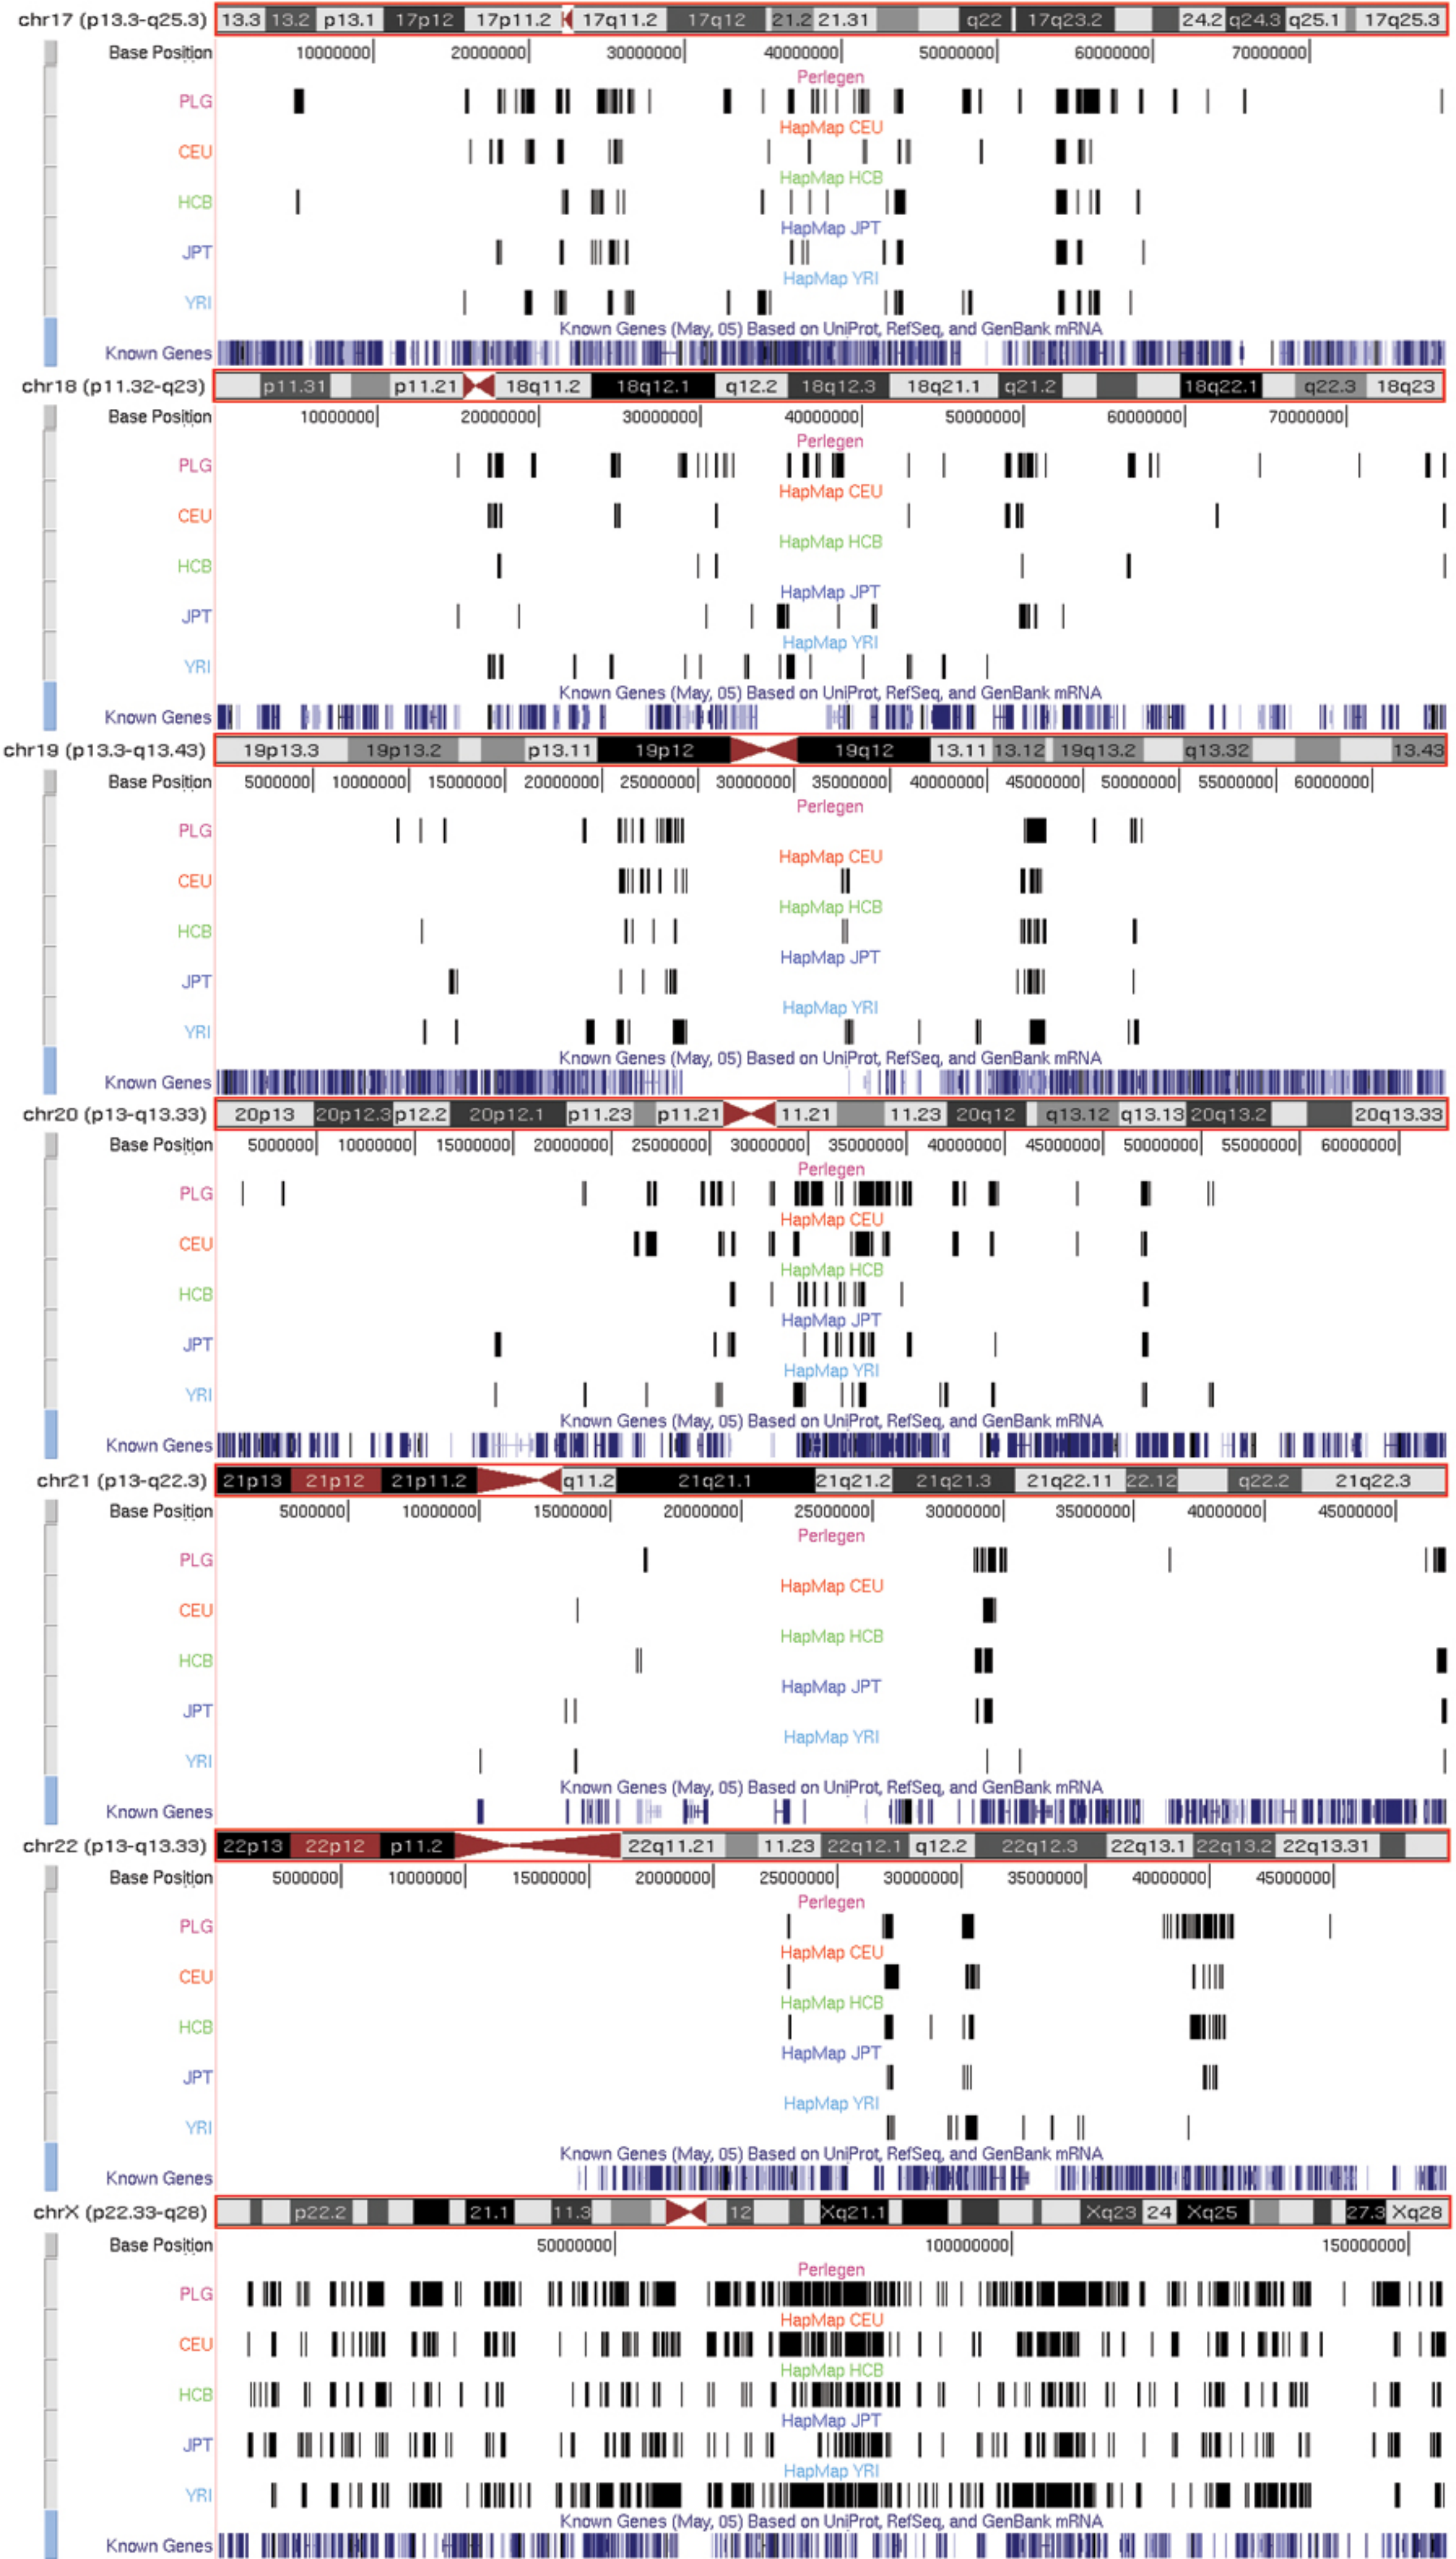

Supplement: pnas_0509691102_4.pdf [file pnas_0509691102_4.pdf]
